# Supplementary material for: Alternative Splicing Events as Indicators for the Prognosis of Uveal Melanoma
Source: MDPI journal article supplement (doi:10.3390/genes11020227), 2020-02-21
Supplement: s1 [file s1]

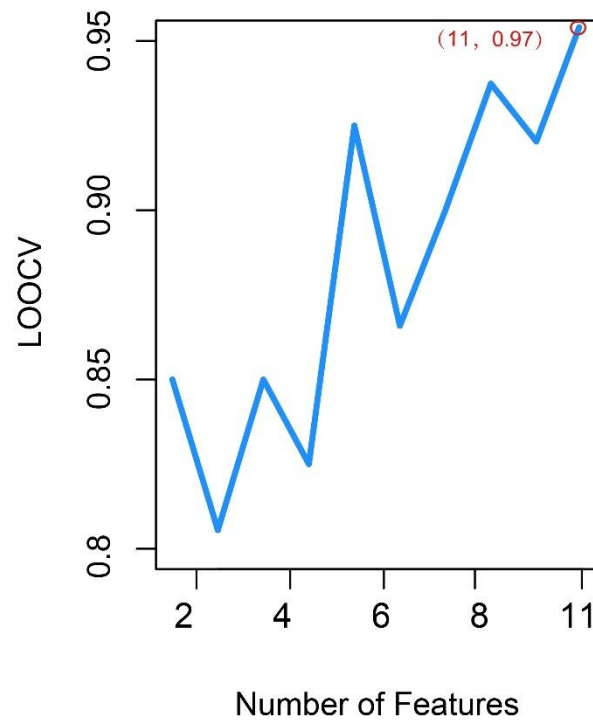

**Supplemental Figure 1.** The accuracy curve with the number of genes and the performance of classifiers. The x-axis was the number of genes used for SVM classifier construction and the y-axis was the accuracy of the SVM classifier evaluated with Leave one out cross validation (LOOCV). The peak of curve was accuracy of 0.97 when 11 spliced genes were used.
